# Supplementary material
Source: ML conference proceedings conference paper supplement (https://openaccess.thecvf.com/content/CVPR_2019/html/Wu_Sliced_Wasserstein_Generative_CVPR_2019_paper.html)
Supplement: Supplementary file 1 [file Wu_Sliced_Wasserstein_Generative_CVPR_2019_supplemental.pdf]

Archive with 12 entries (9 files):
- 1891-supp/
- 1891-supp/1891-supp.pdf
- __MACOSX/
- __MACOSX/1891-supp/
- __MACOSX/1891-supp/._1891-supp.pdf
- 1891-supp/Trailerface_groundtruth.mp4
- __MACOSX/1891-supp/._Trailerface_groundtruth.mp4
- 1891-supp/Trailerface_PG-WGAN-3D_PG-SWGAN-3D.mp4
- __MACOSX/1891-supp/._Trailerface_PG-WGAN-3D_PG-SWGAN-3D.mp4
- 1891-supp/Trailerface_VGAN_MoCoGAN.mp4
- __MACOSX/1891-supp/._Trailerface_VGAN_MoCoGAN.mp4
- __MACOSX/._1891-supp
