# Supplementary material
Source: ML conference proceedings conference paper supplement (https://openaccess.thecvf.com/content/CVPR_2019/html/Wu_Sliced_Wasserstein_Generative_CVPR_2019_paper.html)
Supplement: Supplementary file 1 [file Wu_Sliced_Wasserstein_Generative_CVPR_2019_supplemental.pdf › 1891-supp/1891-supp.pdf]

# Supplementary Material for Sliced Wasserstein Generative Models

Jiqing Wu<sup>\*1</sup> Zhiwu Huang<sup>\*1</sup> Dinesh Acharya<sup>1</sup> Wen Li<sup>1</sup>

Janine Thoma<sup>1</sup> Danda Pani Paudel<sup>1</sup> Luc Van Gool<sup>1,2</sup>

<sup>1</sup> Computer Vision Lab, ETH Zurich, Switzerland <sup>2</sup> VISICS, KU Leuven, Belgium

{jqwu, zhiwu.huang, liwen, jthoma, paudel, vangool}@vision.ee.ethz.ch

<sup>\*</sup>Equal contribution

## A Proof of Theorem 1

In order to prove Theorem 1, we need to apply the Dvoretzky-Kiefer-Wolfowitz inequality,

**Theorem.** (DKW-inequality) Given  $b \in \mathbb{N}$ , let  $Z_1, Z_2, \dots, Z_b$  be real-valued i.i.d. random variables with a continuous CDF  $F_Z$ . Then we define the associated EDF  $F_{Z,b}(t) = \frac{1}{b} \sum_{i=1}^b \mathbf{1}_{\{Z_i \leq t\}}$ , then for all  $\varepsilon \geq \sqrt{\frac{1}{2b} \ln 2}$  it holds

$$\Pr\left(\|F_{Z,b}(t) - F_Z(t)\|_\infty > \varepsilon\right) \leq e^{-2b\varepsilon^2}. \quad (1)$$

Based on the DKW-inequality we have the error estimation for Alg. 1:

**Theorem 1.** Given  $b \in \mathbb{N}$ , let  $Z_1, Z_2, \dots, Z_b$  be real-valued i.i.d. random variables with a continuous CDF  $F_Z^{-1}$  with domain  $[0, 1]$ . Then we define the associated EDF  $F_{Z,b}^{-1}(t) = \frac{1}{b} \sum_{i=1}^b \mathbf{1}_{\{Z_i \leq t\}}$ . Assume  $\tilde{F}_Y, F_Y$  are CDFs satisfying  $\|\tilde{F}_Y - F_Y\|_\infty \leq \gamma$ , then there exists a  $\delta > 0$  such that for all  $\varepsilon - \delta\gamma \geq \sqrt{\frac{1}{2b} \ln 2}$  it holds

$$\Pr\left(\|F_{Z,b}^{-1}\tilde{F}_Y(t) - F_Z^{-1}F_Y(t)\|_\infty > \varepsilon\right) \leq e^{-2b(\varepsilon - \delta\gamma)^2}. \quad (2)$$

**Proof** Let  $\tilde{Z}_i = \tilde{F}_Y^{-1}Z_i$ , it is not hard to see that  $\tilde{Z}_1, \tilde{Z}_2, \dots, \tilde{Z}_b$  are i.i.d random variables with CDF  $F_{Z,b}^{-1}\tilde{F}_Y$ , since

$$F_{Z,b}^{-1}\tilde{F}_Y(t) = \Pr(Z_i < \tilde{F}_Y(t)) = \Pr(\tilde{F}_Y^{-1}Z_i < t). \quad (3)$$

Accordingly, we have the  $\tilde{Z}_i$  associated EDF

$$\tilde{F}_{Z,b}^{-1}(t) = \frac{1}{b} \sum_{i=1}^b \mathbf{1}_{\{\tilde{Z}_i \leq t\}} = \frac{1}{b} \sum_{i=1}^b \mathbf{1}_{\{Z_i \leq \tilde{F}_Y(t)\}} = F_{Z,b}^{-1}\tilde{F}_Y(t). \quad (4)$$

By applying the DKW-inequality it holds for all  $\varepsilon \geq \sqrt{\frac{1}{2b} \ln 2}$

$$\Pr\left(\|F_{Z,b}^{-1}\tilde{F}_Y(t) - F_Z^{-1}\tilde{F}_Y(t)\|_\infty > \varepsilon\right) \leq e^{-2b\varepsilon^2}. \quad (5)$$

Since  $F_Z^{-1}$  is continuous with a compact convex domain  $[0, 1]$ ,  $F_Z^{-1}$  satisfies Lipschitz continuity with a Lipschitz constant  $\delta$  and it holds

$$\begin{aligned} & \|F_{Z,b}^{-1}\tilde{F}_Y(t) - F_Z^{-1}F_Y(t)\|_\infty \\ & \leq \|F_{Z,b}^{-1}\tilde{F}_Y(t) - F_Z^{-1}\tilde{F}_Y(t)\|_\infty + \|F_Z^{-1}\tilde{F}_Y(t) - F_Z^{-1}F_Y(t)\|_\infty \\ & \leq \|F_{Z,b}^{-1}\tilde{F}_Y(t) - F_Z^{-1}\tilde{F}_Y(t)\|_\infty + \delta\gamma, \end{aligned} \quad (6)$$

then for  $\omega \in \{\|F_{Z,b}^{-1}\tilde{F}_Y - F_Z^{-1}F_Y\|_\infty > \varepsilon\}$  we have

$$\omega \in \{\|F_{Z,b}^{-1}\tilde{F}_Y - F_Z^{-1}\tilde{F}_Y\|_\infty > \varepsilon - \delta\gamma\}. \quad (7)$$

Therefore, for all  $\varepsilon - \delta\gamma \geq \sqrt{\frac{1}{2b} \ln 2}$  we have

$$\Pr\left(\|F_{Z,b}^{-1}\tilde{F}_Y(t) - F_Z^{-1}F_Y(t)\|_\infty > \varepsilon\right) \leq e^{-2b(\varepsilon - \delta\gamma)^2}. \quad \square \quad (8)$$

## B Complementary study of $k, k'$

| $k \backslash k'$ | 0           | 0.1  | 1    |
|-------------------|-------------|------|------|
| $10^{-4}$         | 14.8        | 15.2 | 14.9 |
| $10^{-3}$         | <b>13.0</b> | 15.0 | 15.5 |
| 0.1               | 20.9        | 17.9 | 16.7 |
| 1                 | 22.0        | 22.2 | 21.5 |
| 10                | 22.5        | 19.3 | 22.7 |

Figure 1. Complementary FID scores to Fig. 3 (Left h).

## C More Hyperparameter Studies

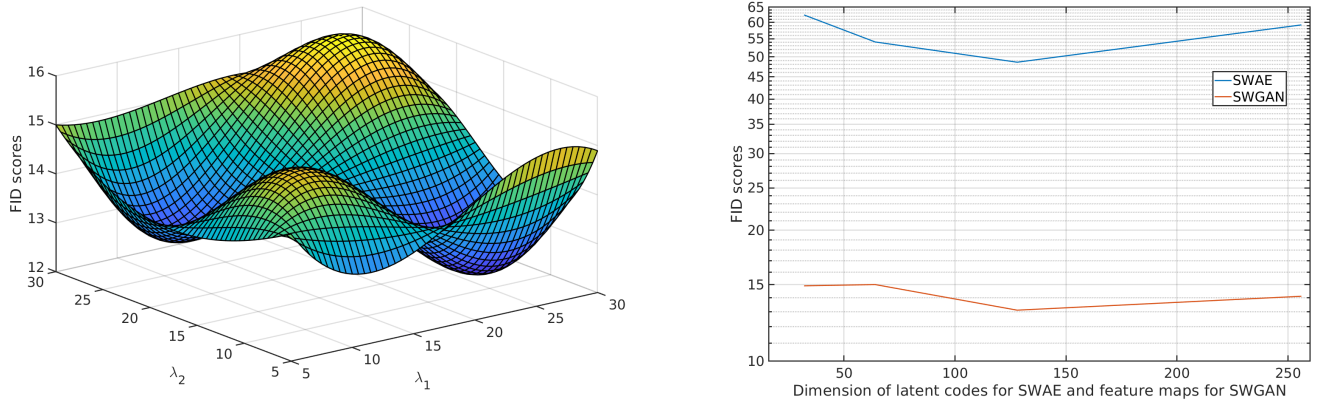

Figure 2. The FID scores of various  $\lambda_1, \lambda_2$  (left) and dimensions of latent codes for SWAE and feature maps for SWGAN (right). We can see that the FID scores are not very sensitive to the changes of  $\lambda_1, \lambda_2$ , while the optimal dimension for SWAE and SWGAN is 128.

## D Model Stability Study

|               | ResNet (w/ norm)                                                                            | ResNet (w/o norm)                                                                           | ConvNet (w/ norm)                                                                            | ConvNet (w/o norm)                                                                            |
|---------------|---------------------------------------------------------------------------------------------|---------------------------------------------------------------------------------------------|----------------------------------------------------------------------------------------------|-----------------------------------------------------------------------------------------------|
| CTGAN         | 16.0<br>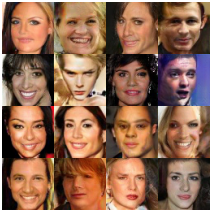   | 16.5<br>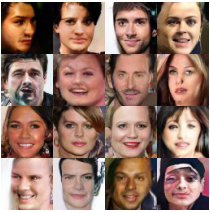   | 19.5<br>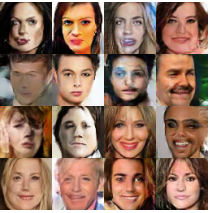   | 19.7<br>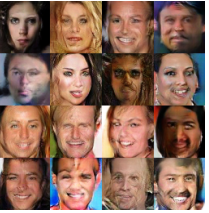   |
| SWG           | 24.3<br>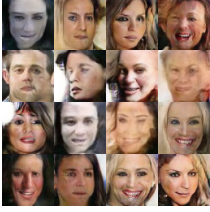   | 29.1<br>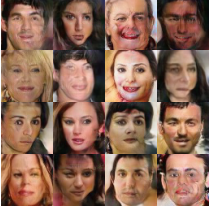   | 22.2<br>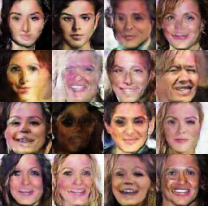   | 28.5<br>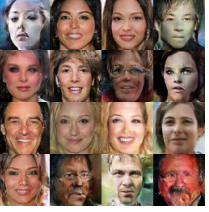   |
| SWGAN         | 13.0<br>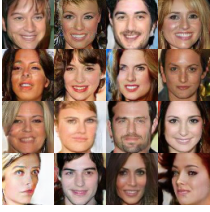  | 14.8<br>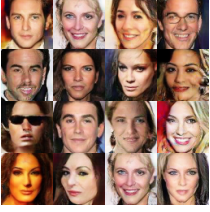  | 19.2<br>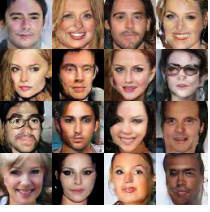  | 18.8<br>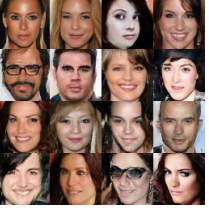  |
| WAE-MMD       | 64.0<br>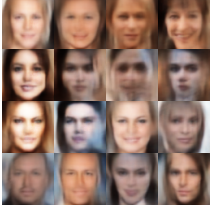 | 61.8<br>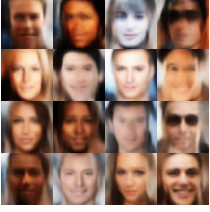 | 55.8<br>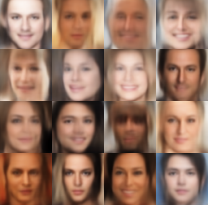 | 67.8<br>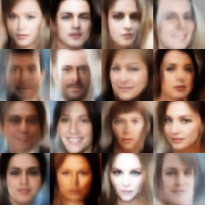 |
| AAE (WAE-GAN) | 62.3<br>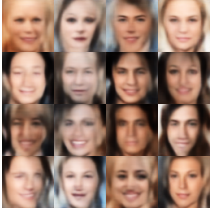 | 56.7<br>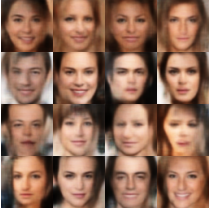 | 48.3<br>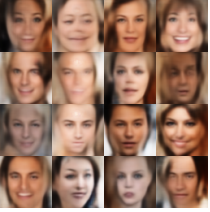 | 66.1<br>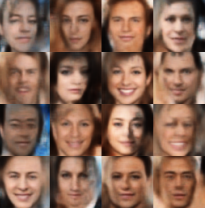 |
| SWAE          | 63.2<br>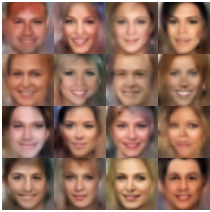 | 59.1<br>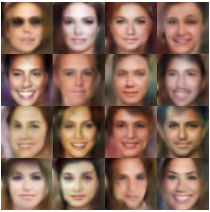 | 65.2<br>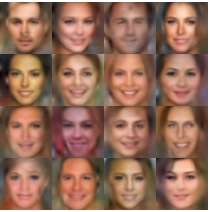 | 48.6<br>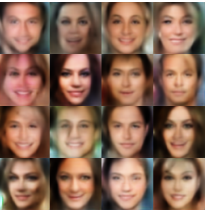 |

Table 1. FID scores of various architectures on CelebA. The optimal architectures are ConvNet for SWG, WAE-MMD, AAE (WAE-GAN), ResNet for CTGAN, SWGAN, and ConvNet without normalization (w/o norm) for SWAE.

## E Architecture Details of Our Proposed Models

| <b>Encoder</b>       | Kernel size  | Resampling | Output shape             |
|----------------------|--------------|------------|--------------------------|
| NearestNeighbor      | –            | Down       | $3 \times 16 \times 16$  |
| Linear               | –            | –          | 128                      |
| 3 Primal SWD blocks  | –            | –          | 128                      |
| <b>Decoder</b>       |              |            |                          |
| Noise                | –            | –          | 128                      |
| Linear               | –            | –          | $64 \times 8 \times 8$   |
| 2 (Conv, ELU) blocks | $3 \times 3$ | –          | $64 \times 8 \times 8$   |
| NearestNeighbor      | –            | Up         | $64 \times 16 \times 16$ |
| 2 (Conv, ELU) blocks | $3 \times 3$ | –          | $64 \times 16 \times 16$ |
| NearestNeighbor      | –            | Up         | $64 \times 32 \times 32$ |
| 2 (Conv, ELU) blocks | $3 \times 3$ | –          | $64 \times 32 \times 32$ |
| NearestNeighbor      | –            | Up         | $64 \times 64 \times 64$ |
| 2 (Conv, ELU) blocks | $3 \times 3$ | –          | $64 \times 64 \times 64$ |
| Conv, tanh           | $3 \times 3$ | –          | $3 \times 64 \times 64$  |

Table 2. Network architecture for SWAE

| <b>Generator</b>               | Kernel size  | Resampling | Output shape              |
|--------------------------------|--------------|------------|---------------------------|
| Noise                          | –            | –          | 128                       |
| Linear                         | –            | –          | $128 \times 4 \times 4$   |
| 2 (Res, ReLU) blocks           | $3 \times 3$ | Up         | $128 \times 8 \times 8$   |
| 2 (Res, ReLU) blocks           | $3 \times 3$ | Up         | $128 \times 16 \times 16$ |
| 2 (Res, ReLU) blocks           | $3 \times 3$ | Up         | $128 \times 32 \times 32$ |
| 2 (Res, ReLU) blocks           | $3 \times 3$ | Up         | $128 \times 64 \times 64$ |
| Conv, tanh                     | $3 \times 3$ | –          | $3 \times 64 \times 64$   |
| <b>Discriminator</b>           |              |            |                           |
| 2 (Res, ReLU) blocks           | $3 \times 3$ | Down       | $128 \times 32 \times 32$ |
| 2 (Res, ReLU) blocks           | $3 \times 3$ | Down       | $128 \times 16 \times 16$ |
| 2 (Res, ReLU) blocks           | $3 \times 3$ | Down       | $128 \times 8 \times 8$   |
| 2 (Res, ReLU) blocks           | $3 \times 3$ | –          | $128 \times 8 \times 8$   |
| Linear                         | –            | –          | 128                       |
| 4 (Dual, LeakyReLU) SWD blocks | –            | –          | 128                       |

Table 3. Network architecture for SWGAN

## F More Visual Results for SWAE, SWGAN and Compared Methods

| VAE                                                                                | WAE-MMD                                                                            | AAE (WAE-GAN)                                                                       | SWAE                                                                                 |
|------------------------------------------------------------------------------------|------------------------------------------------------------------------------------|-------------------------------------------------------------------------------------|--------------------------------------------------------------------------------------|
| 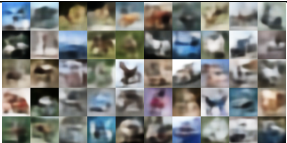  | 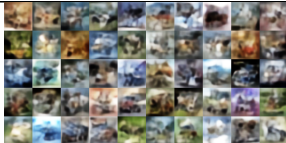  | 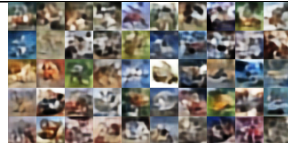  | 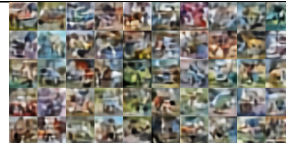  |
| 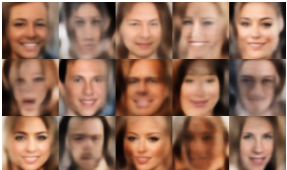  | 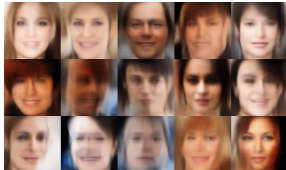  | 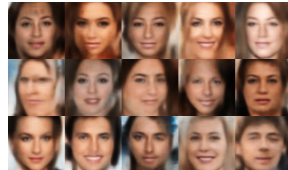  | 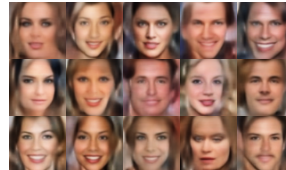  |
| SWG                                                                                | CTGAN                                                                              | WGAN-GP                                                                             | SWGAN                                                                                |
| 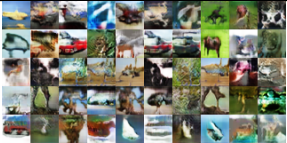  | 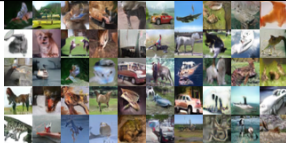  | 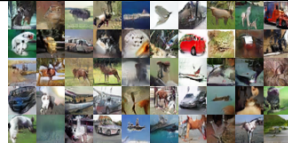  | 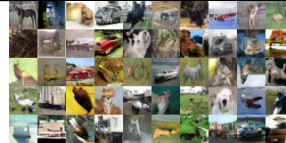  |
| 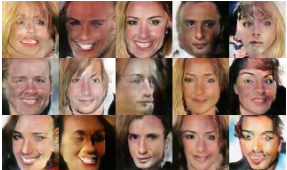  | 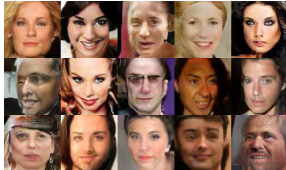  | 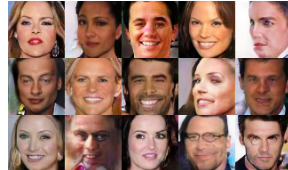  | 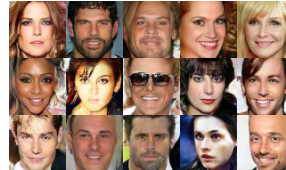  |
| 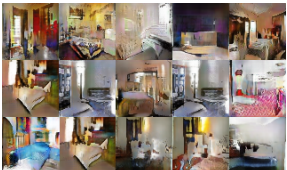 | 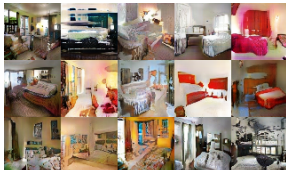 | 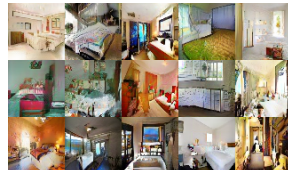 | 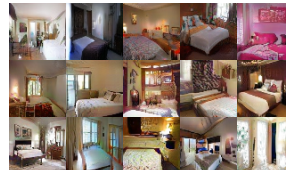 |

Table 4. Visual results of AE-based (top 2 rows) and GAN (bottom 3 rows) models on CIFAR-10, CelebA and LSUN.

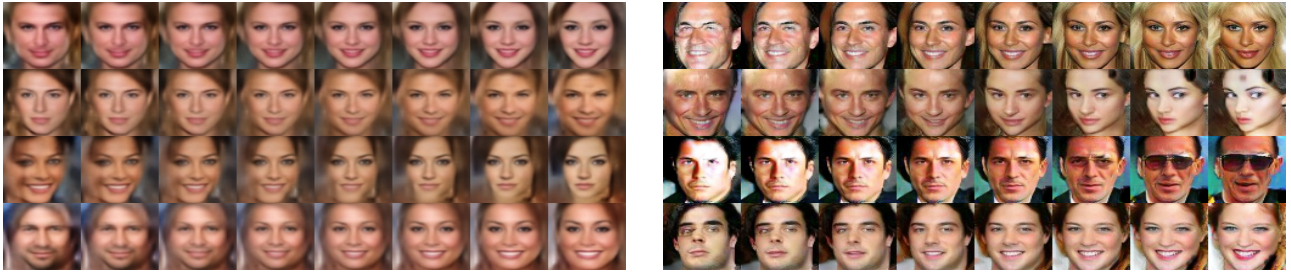

Table 5. Interpolation results of the proposed SWAE (left) and SWGAN (right) models on CelebA.

## G More Visual Results for PG-WGAN and PG-SWGAN

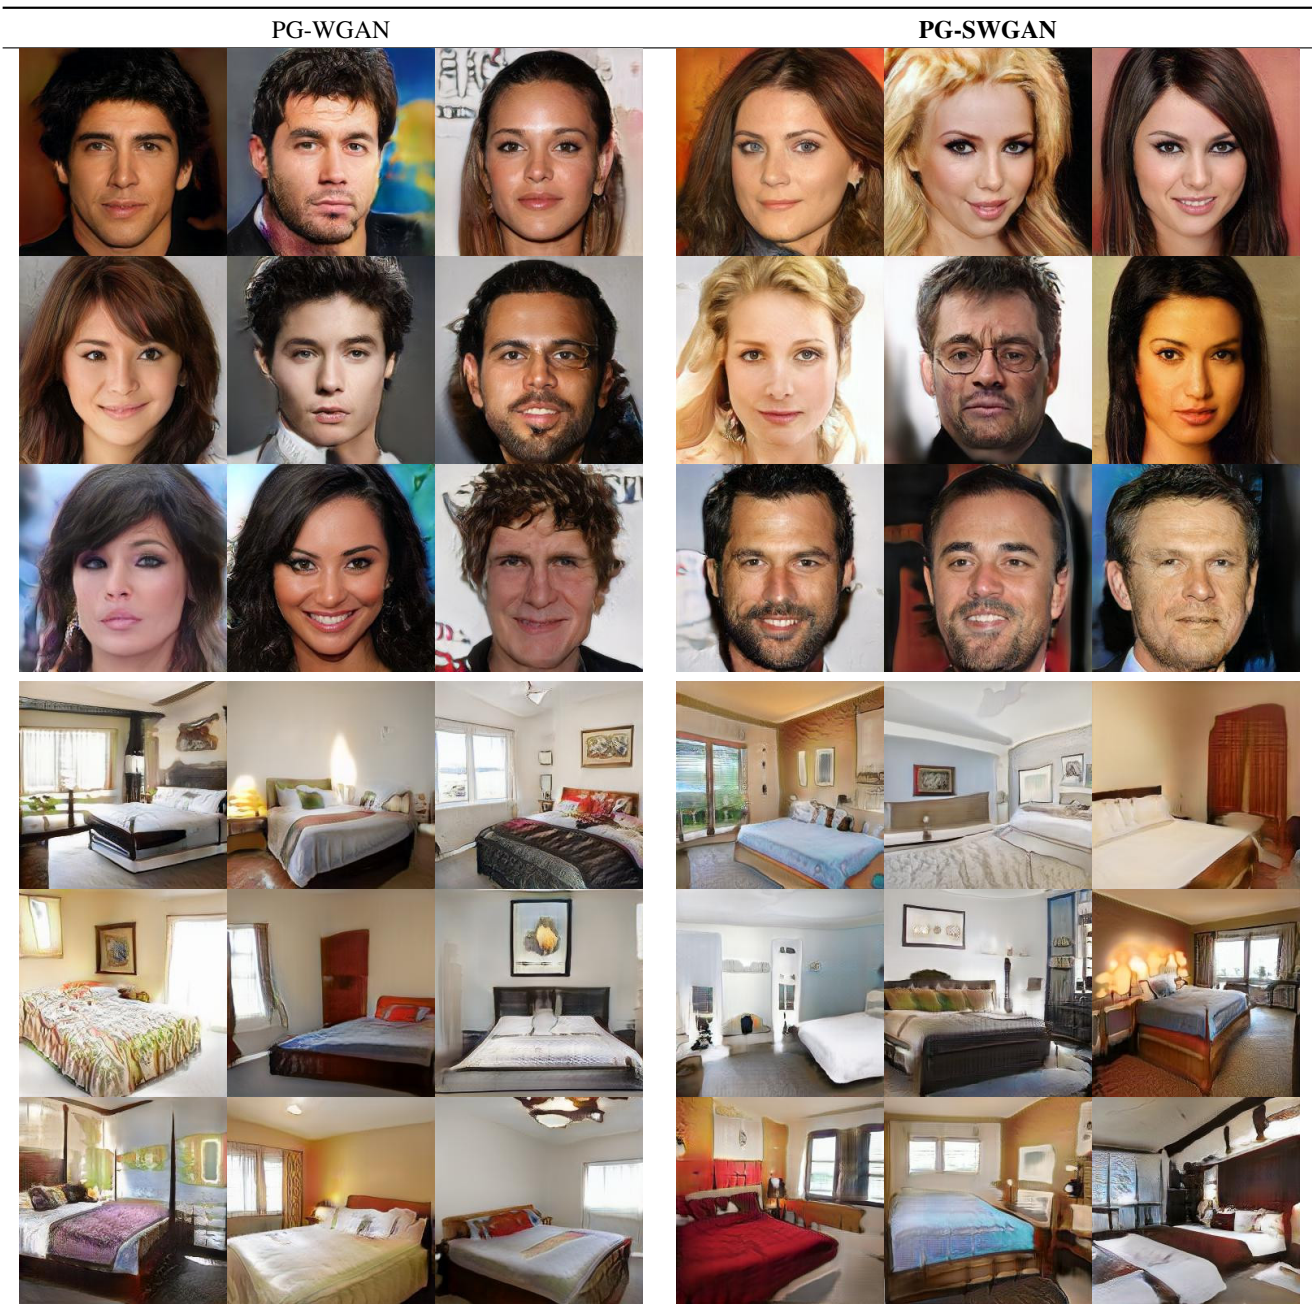

Figure 3. Visual results for PG-WGAN and PG-SWGAN on CelebA-HQ and LSUN.
